# Supplementary material for: A stereoselective synthesis of fully substituted tetrahydrofurans through 1,3-dipolar cycloaddition with cinnamaldehydes: an easy access to chroman derivatives
Source: Royal Society of Chemistry journal article supplement (doi:10.1039/c3ra44123g), 2013-01-01

# **A Stereoselective Synthesis of Fully Substituted Tetrahydrofurans through 1,3-Dipolar Cycloadditions with Cinnamaldehydes: An Easy Access to Chroman Derivatives**

**Lin Qiu, Xin Guo, Jun Zhou, Shunying Liu,\* Liping Yang,**

**Xiang Wu and Wenhao Hu\***

*Shanghai Engineering Research Centre of Molecular Therapeutics and  
New Drug Development, East China Normal University, Shanghai,  
200062, P. R. China.*

**E-mail:**syliu@sist.ecnu.edu.cn, whu@chem.ecnu.edu.cn;

**Fax:** +86-021-62221237

## **Supporting Information**

| <b>Contents</b>                                                      | <b>pages</b> |
|----------------------------------------------------------------------|--------------|
| 1. Crystal data of 4f.....                                           | S2           |
| 2. Characterization Data of Products.....                            | S3           |
| 3. <sup>1</sup> H NMR NOESY spectrum of 6a (Major Diastereomer)..... | S18          |
| 4. <sup>1</sup> H NMR NOESY spectrum of 4h Minor Diastereomer.....   | S20          |

## 1. Crystal data of 4f (CCDC 939643)

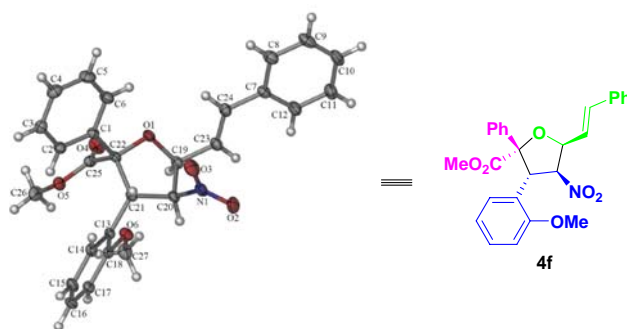

|                                     |                                                      |                                                  |
|-------------------------------------|------------------------------------------------------|--------------------------------------------------|
| Bond precision:                     | C-C = 0.0022 Å                                       | Wavelength=0.71073                               |
| Cell:                               | a=9.2228 (6)      b=7.4537 (5)      c=16.9570 (12)   | alpha=90      beta=96.151 (2)      gamma=90      |
| Temperature:                        | 296 K                                                |                                                  |
|                                     | Calculated                                           | Reported                                         |
| Volume                              | 1158.98 (14)                                         | 1158.98 (14)                                     |
| Space group                         | P 21                                                 | P2 (1)                                           |
| Hall group                          | P 2yb                                                | ?                                                |
| Moiety formula                      | C <sub>27</sub> H <sub>25</sub> N O <sub>6</sub>     | ?                                                |
| Sum formula                         | C <sub>27</sub> H <sub>25</sub> N O <sub>6</sub>     | C <sub>27</sub> H <sub>25</sub> N O <sub>6</sub> |
| Mr                                  | 459.48                                               | 459.48                                           |
| D <sub>x</sub> , g cm <sup>-3</sup> | 1.317                                                | 1.317                                            |
| Z                                   | 2                                                    | 2                                                |
| Mu (mm <sup>-1</sup> )              | 0.093                                                | 0.093                                            |
| F <sub>000</sub>                    | 484.0                                                | 484.0                                            |
| F <sub>000</sub> '                  | 484.25                                               |                                                  |
| h, k, lmax                          | 10, 8, 20                                            | 10, 8, 20                                        |
| Nref                                | 2204 [ 4066]                                         | 3663                                             |
| Tmin, Tmax                          | 0.968, 0.989                                         | 0.957, 0.989                                     |
| Tmin'                               | 0.956                                                |                                                  |
| Correction method=                  | MULTI-SCAN                                           |                                                  |
| Data completeness=                  | 1.66/0.90      Theta(max)= 25.000                    |                                                  |
| R(reflections)=                     | 0.0273 ( 3565)      wR2(reflections)= 0.0731 ( 3663) |                                                  |
| S =                                 | 1.079      Npar= 307                                 |                                                  |

## 2. Characterization Data of Products

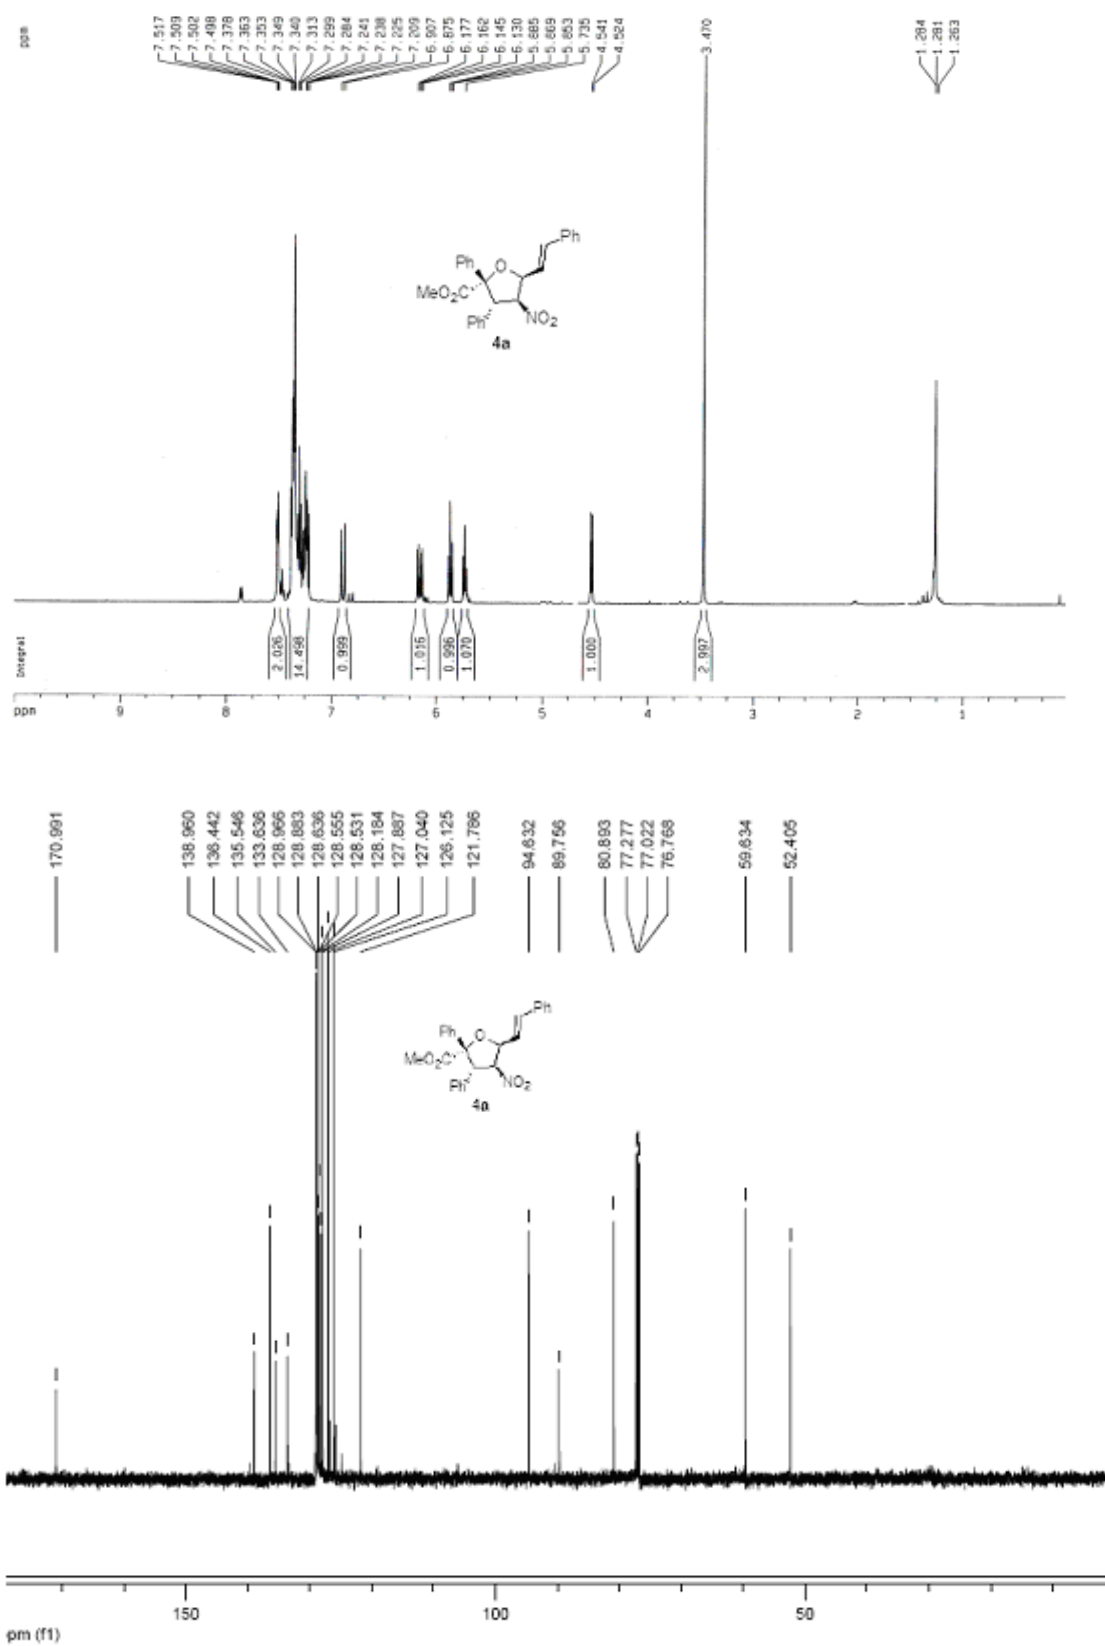

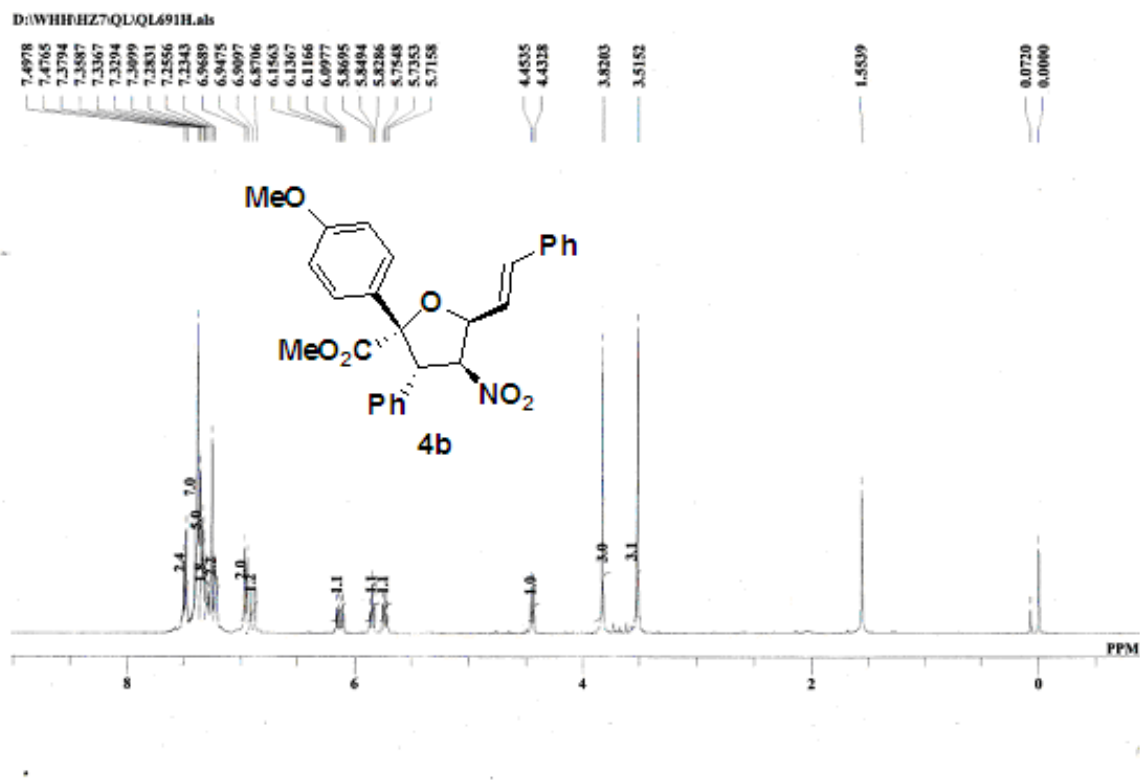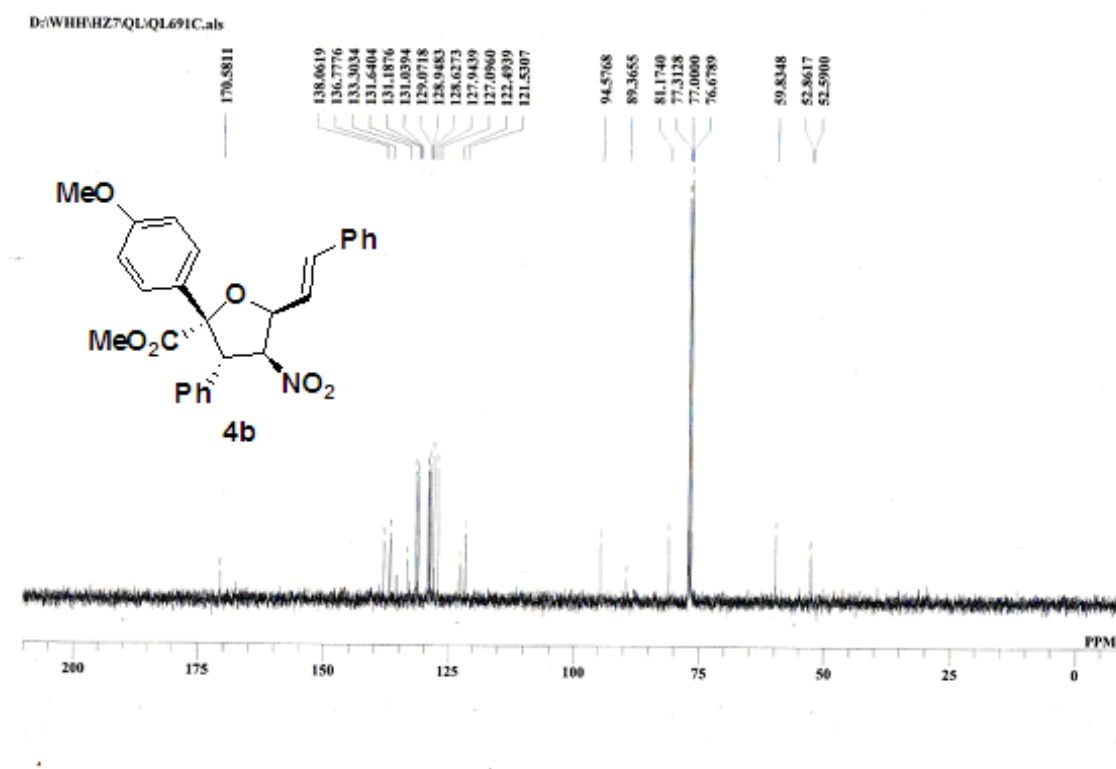

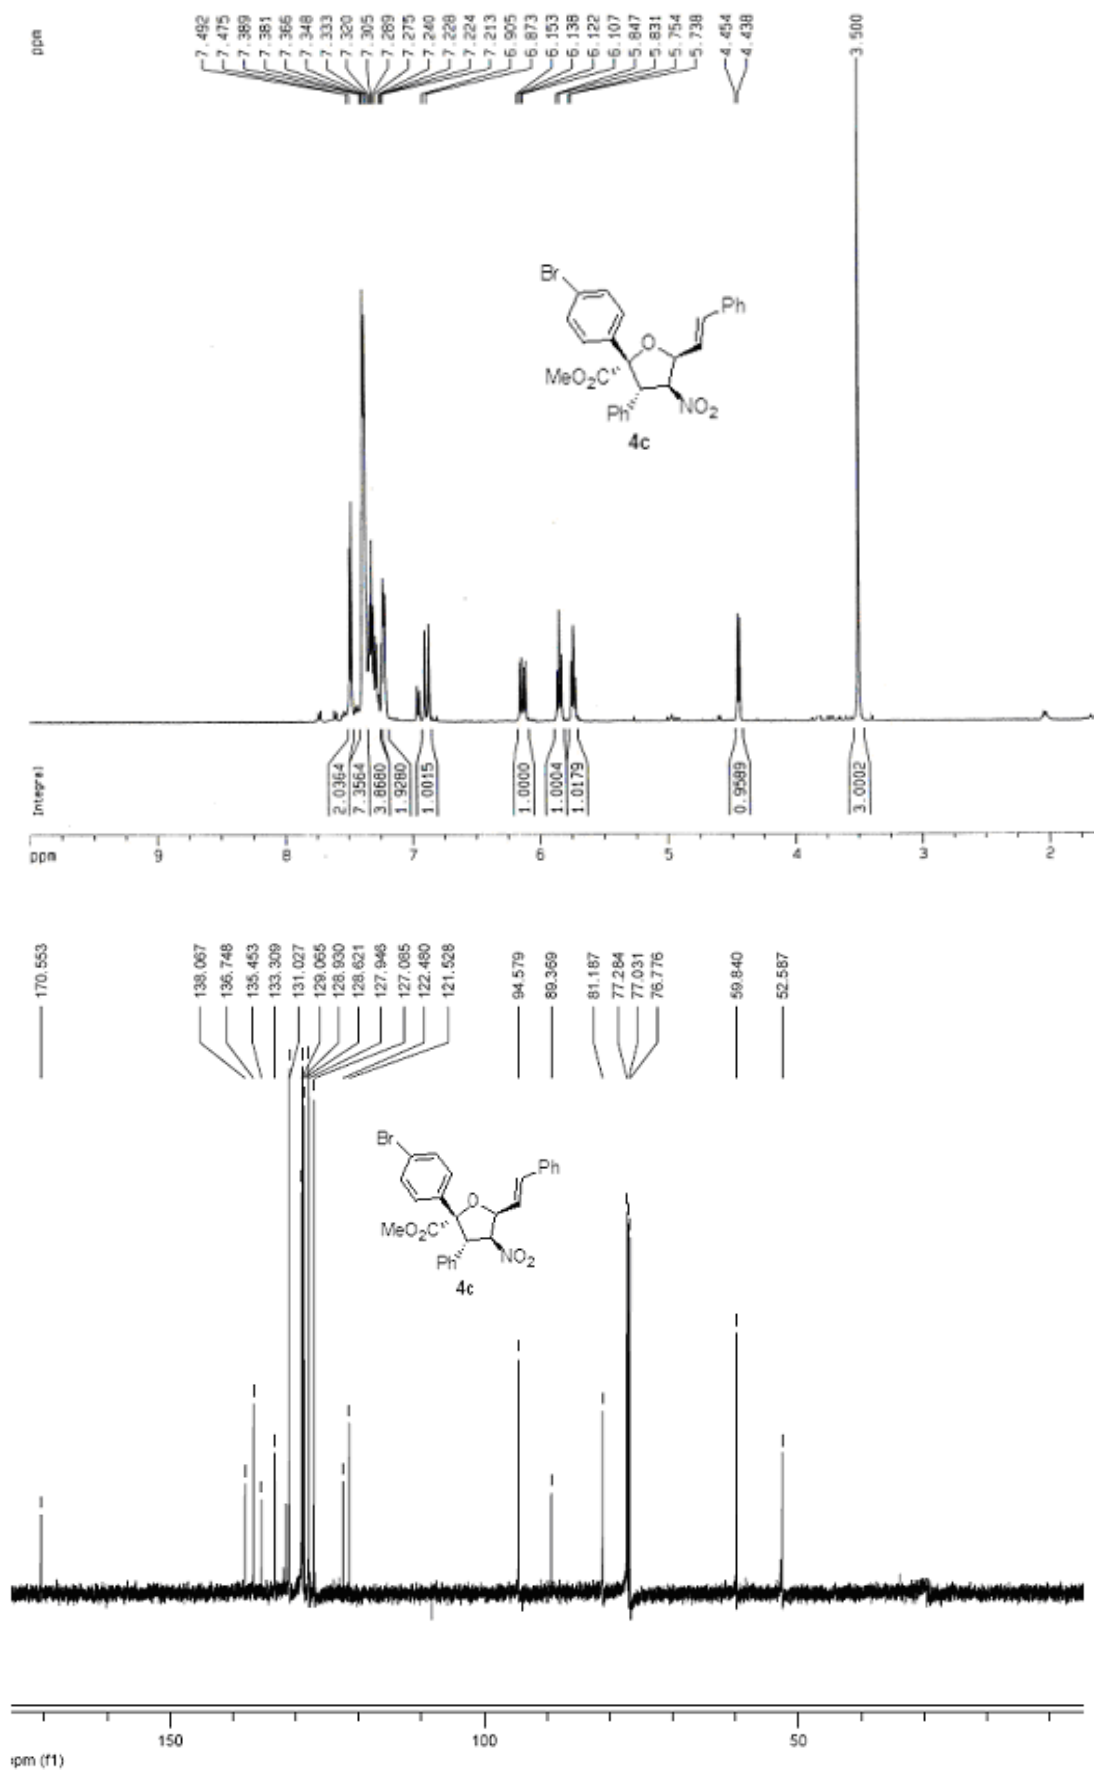

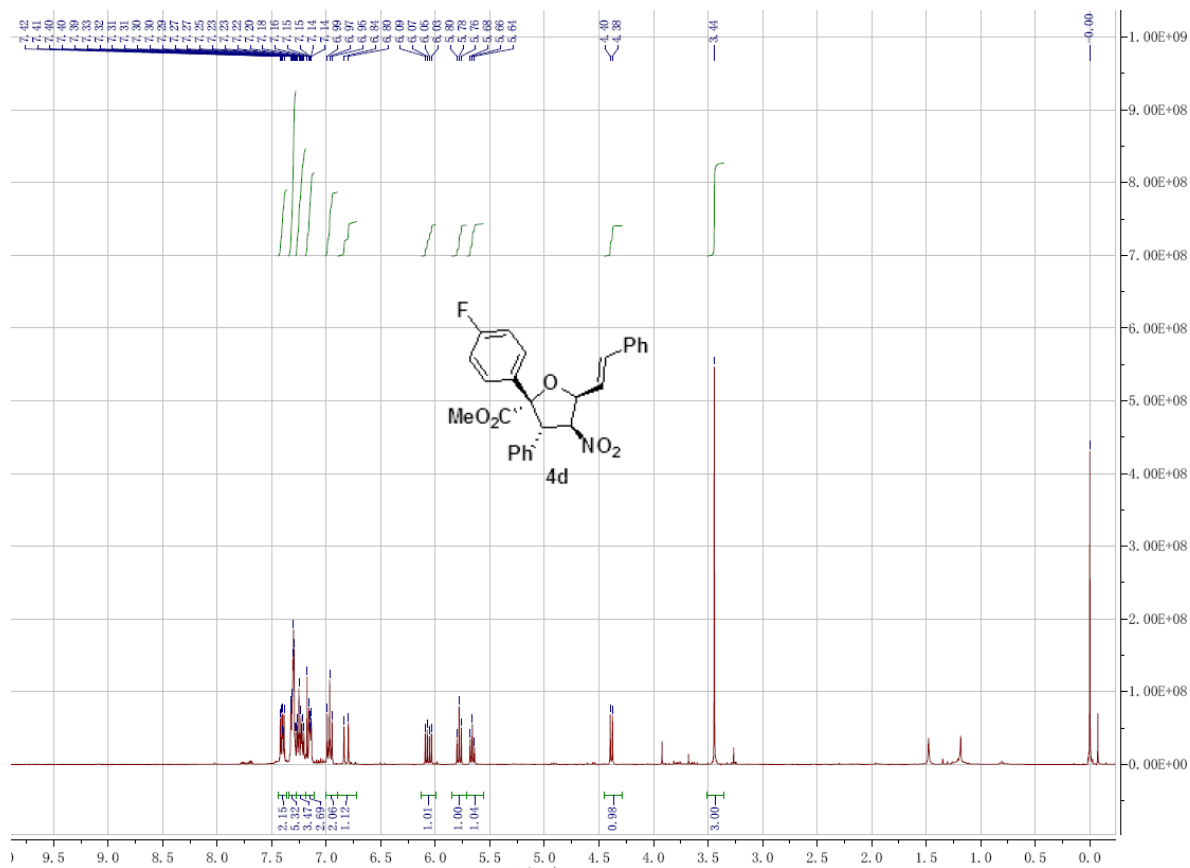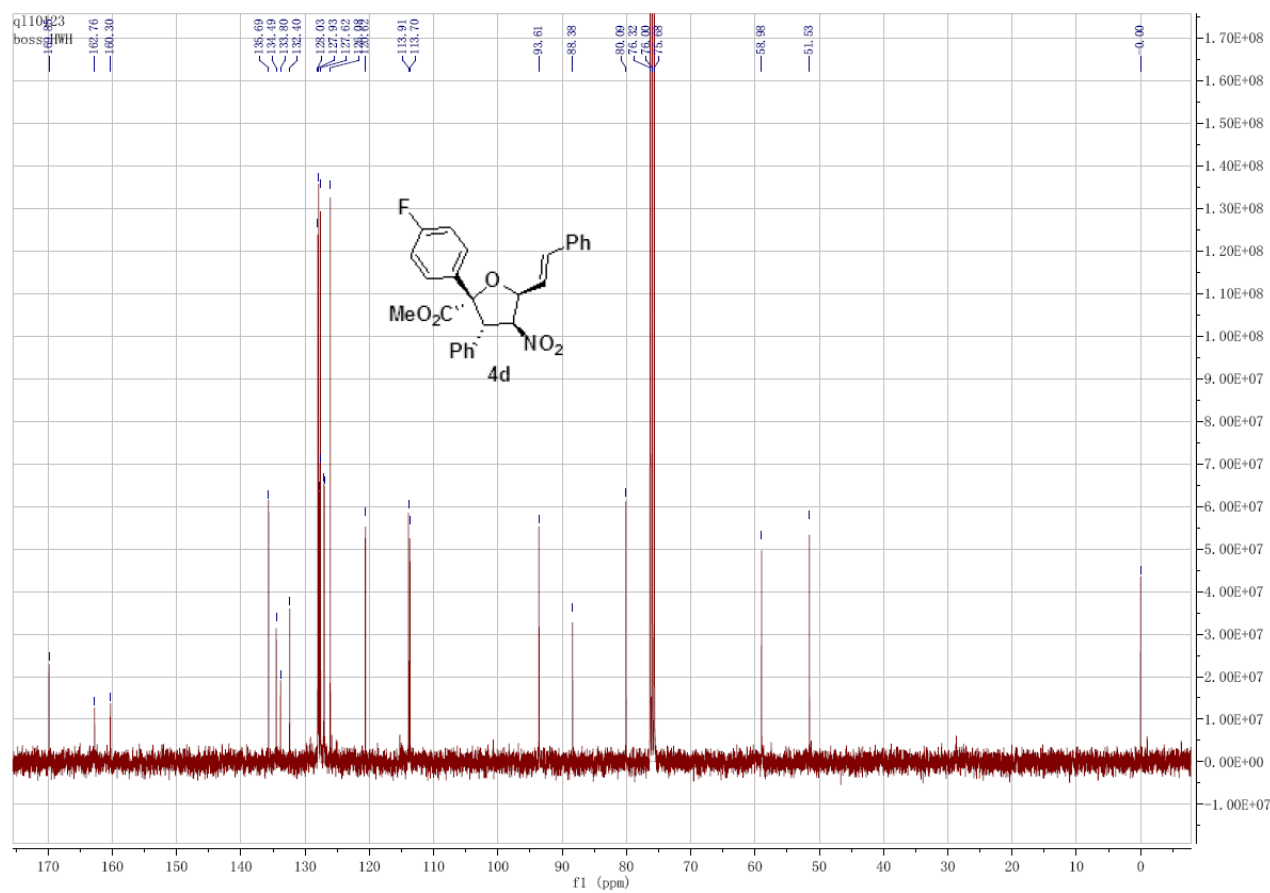

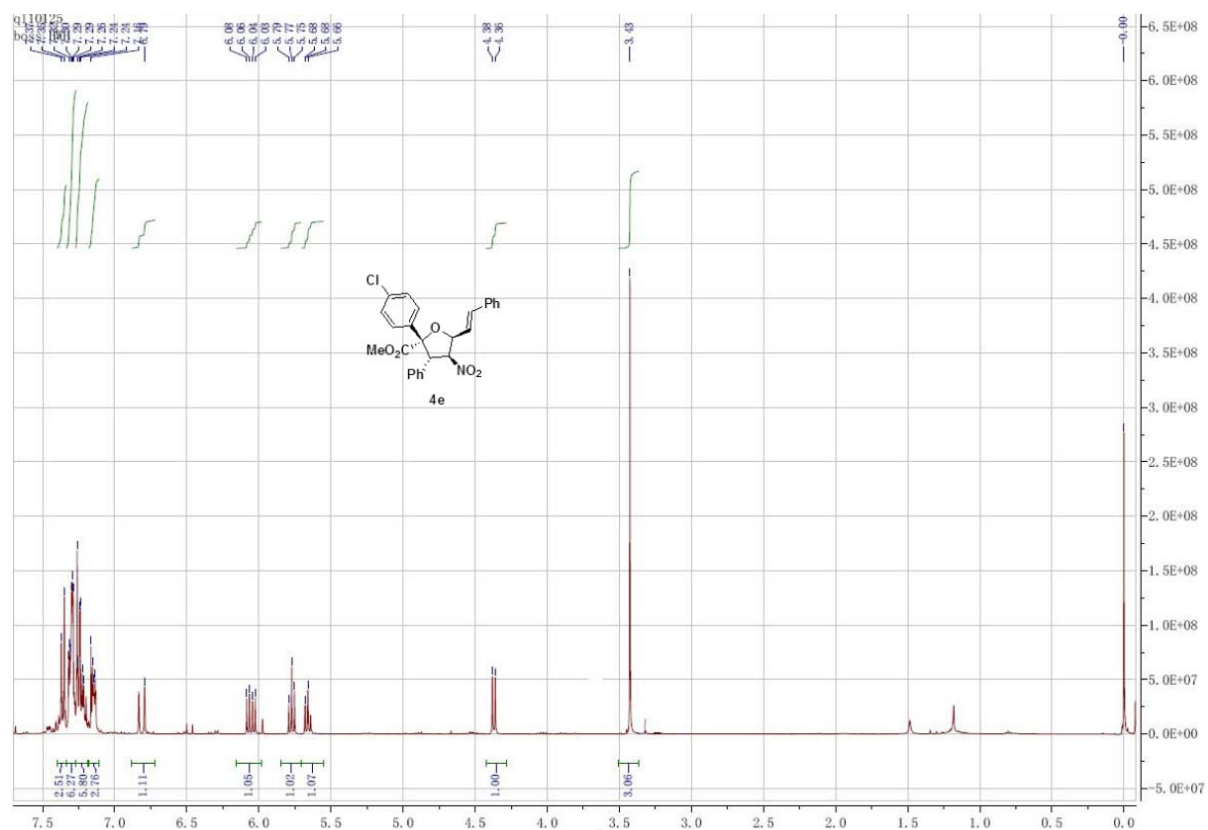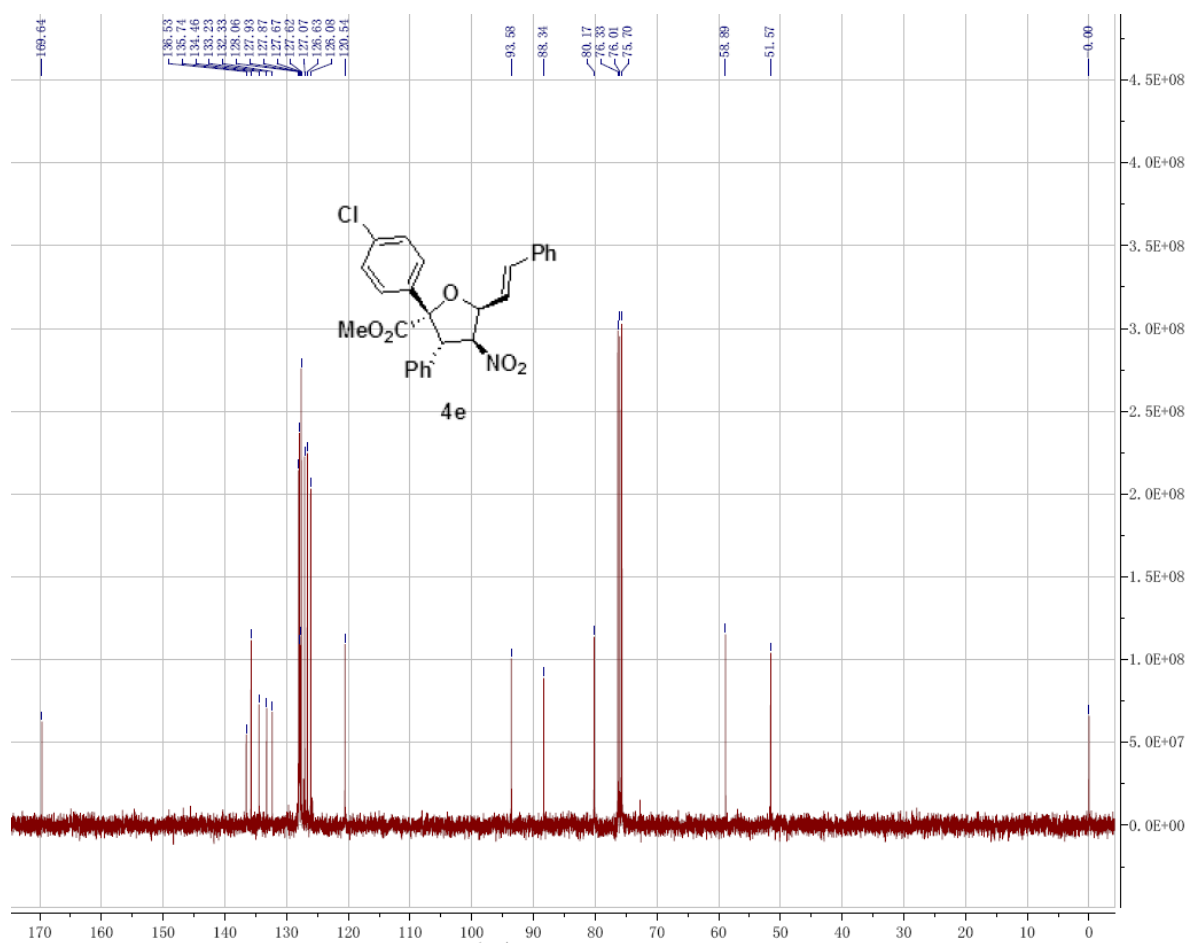

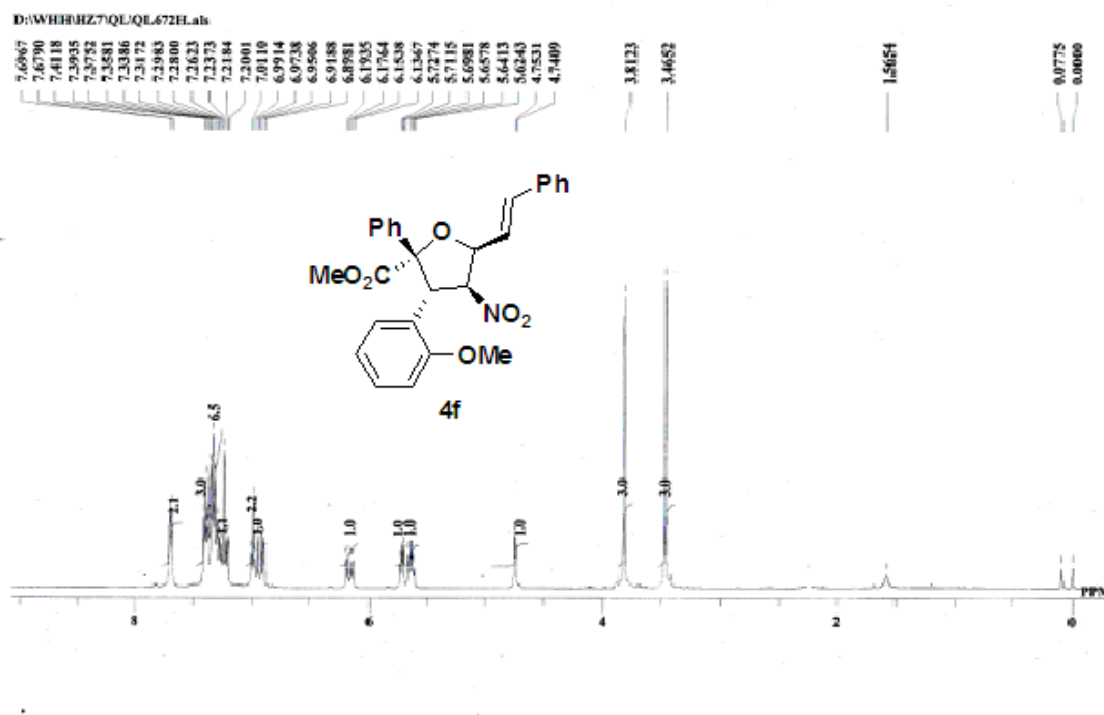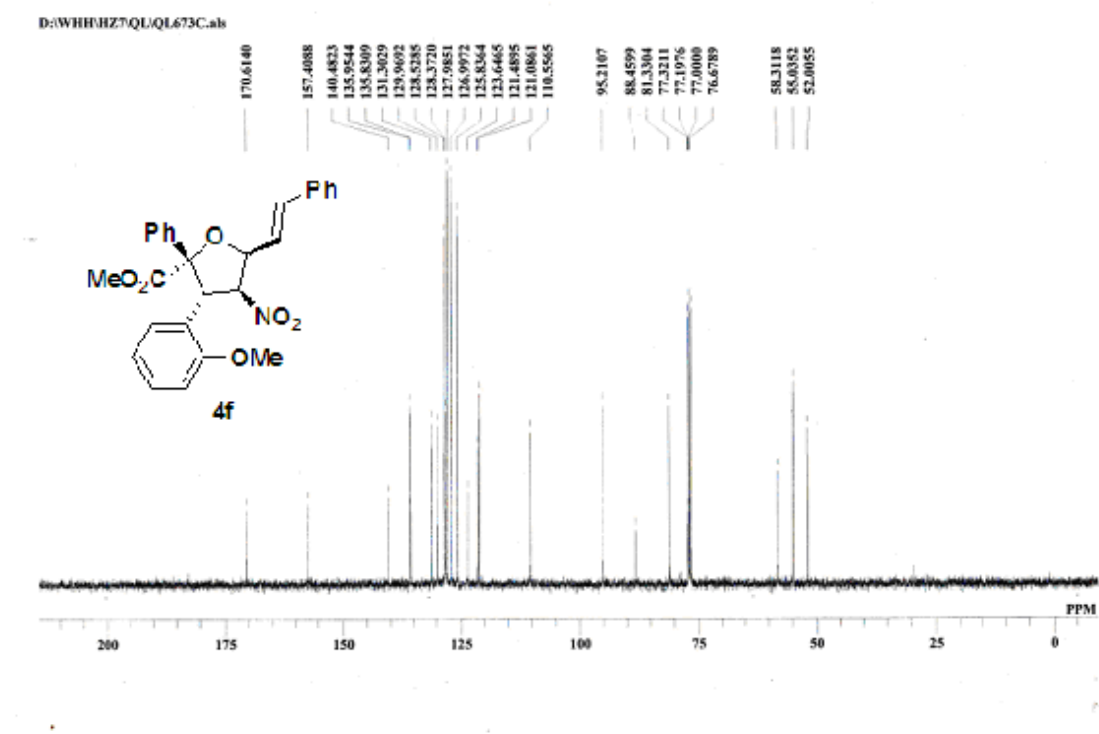





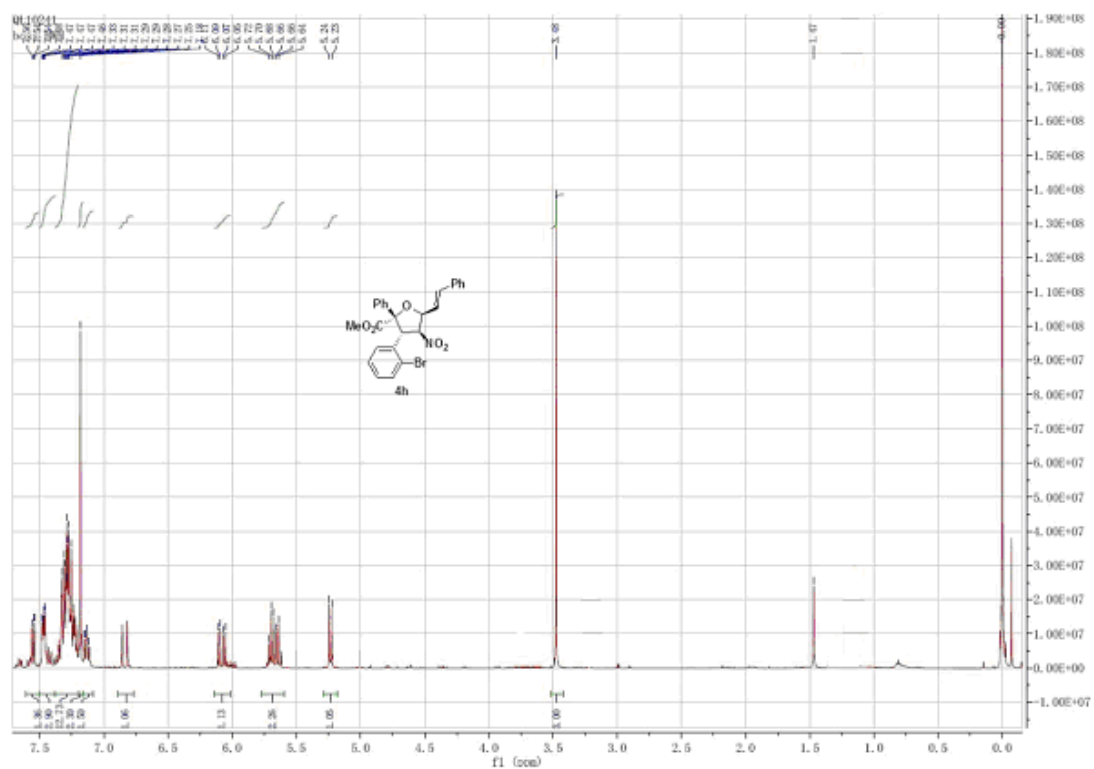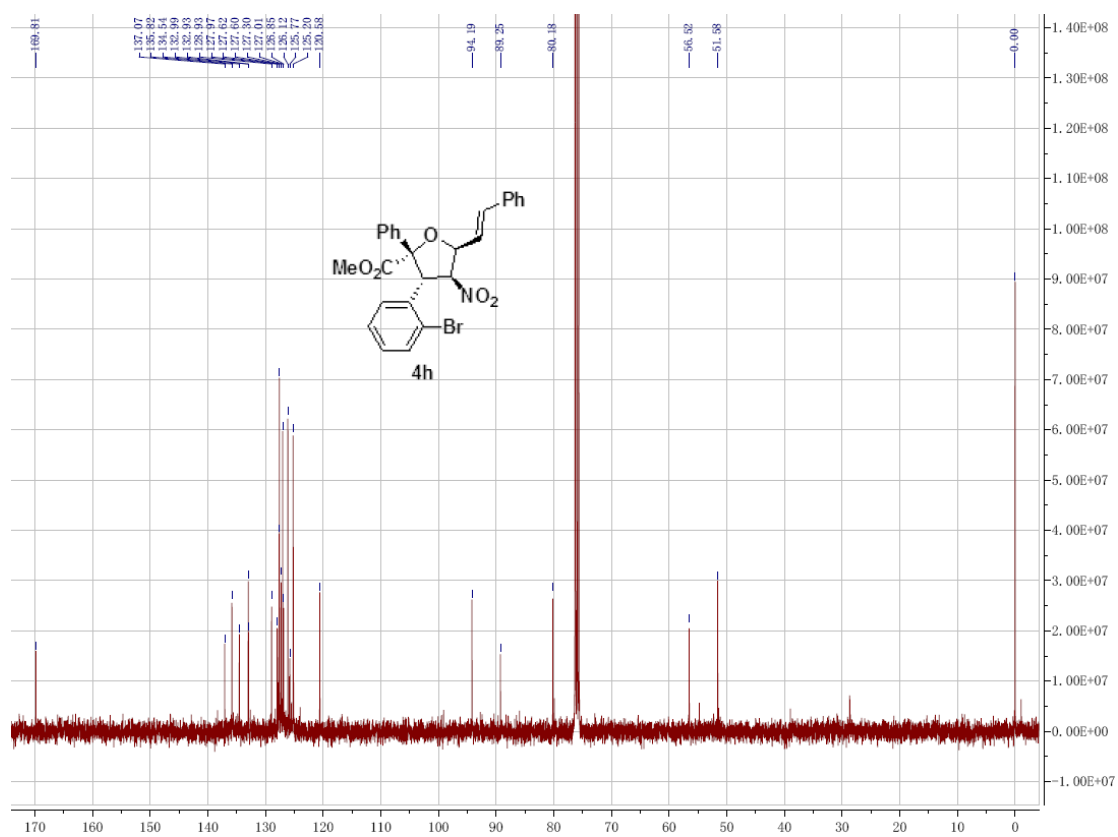

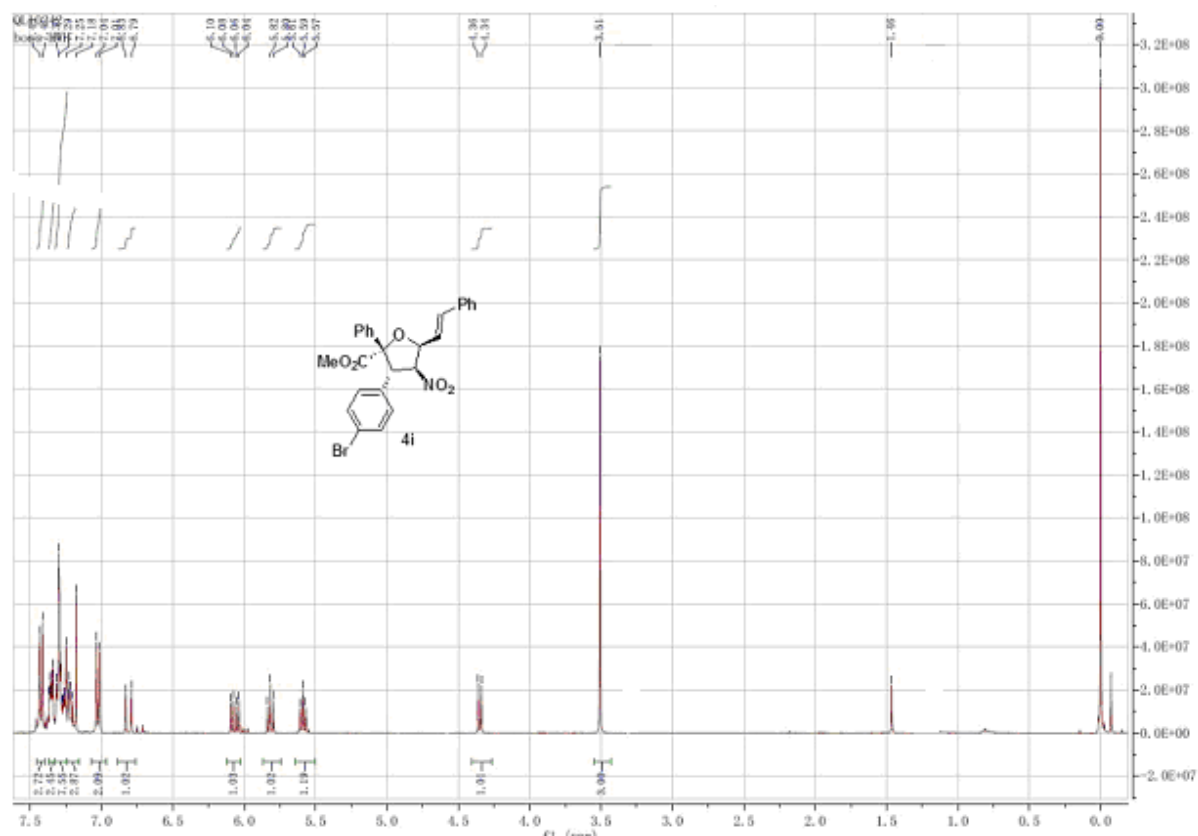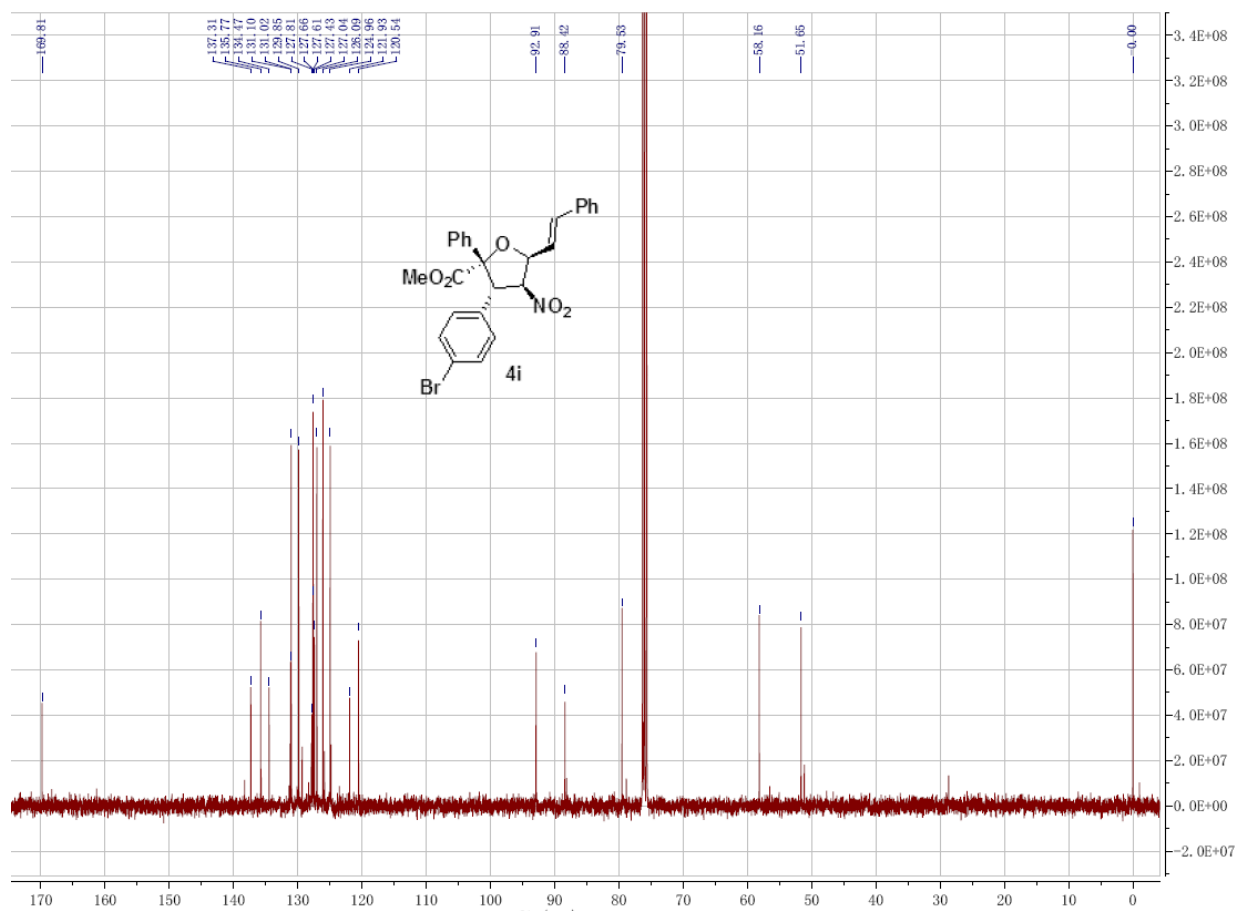

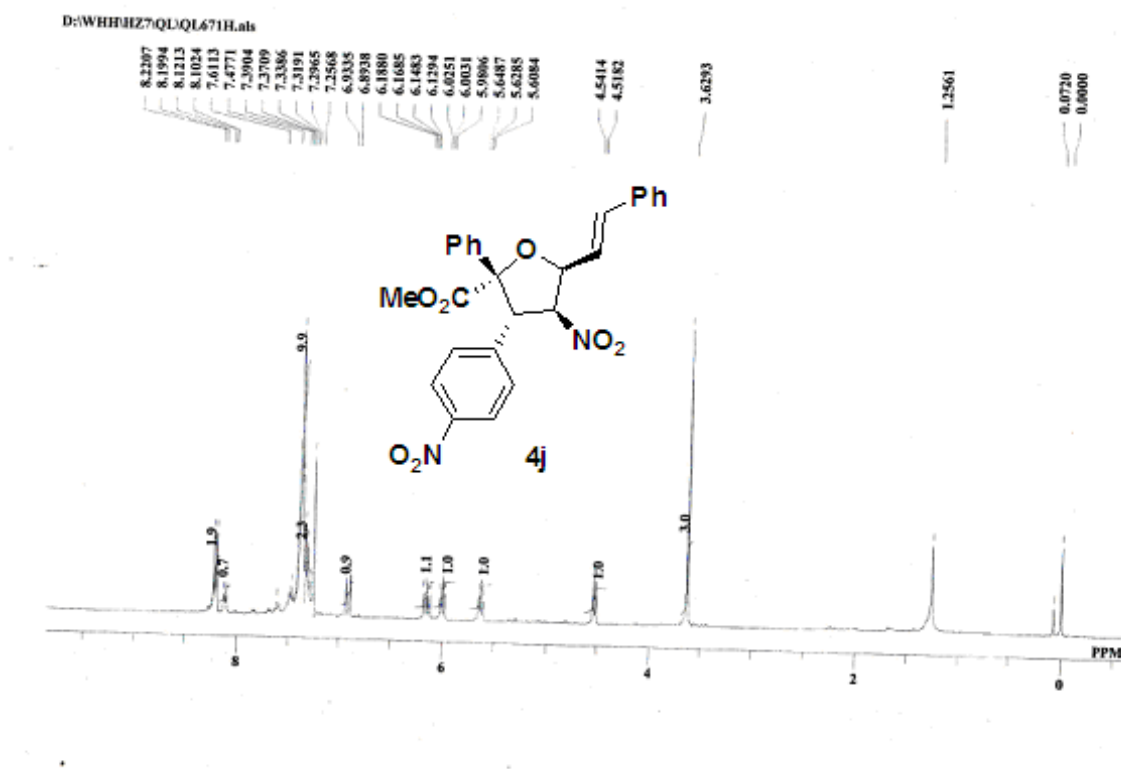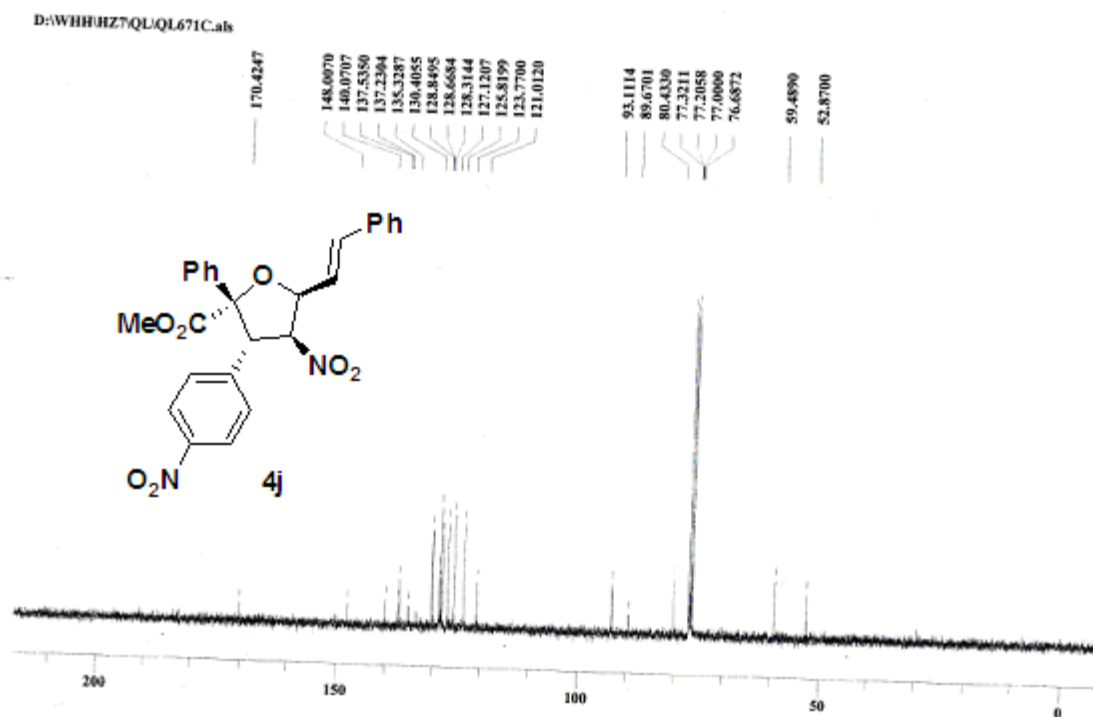

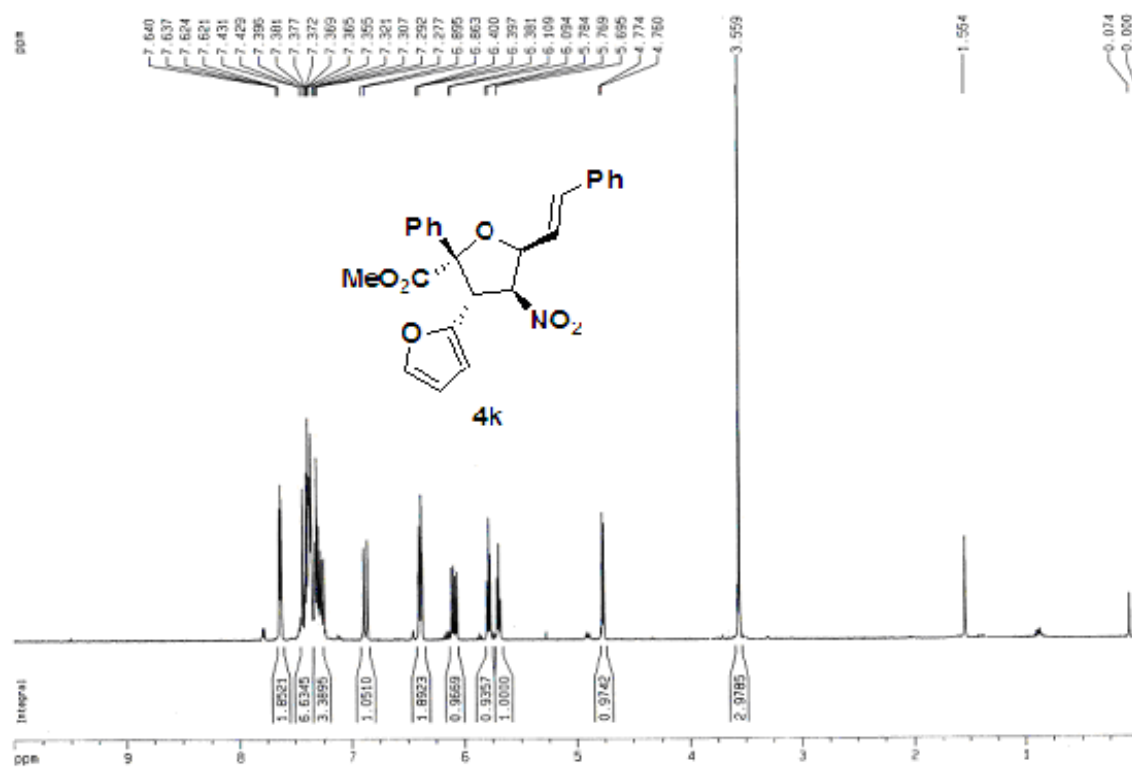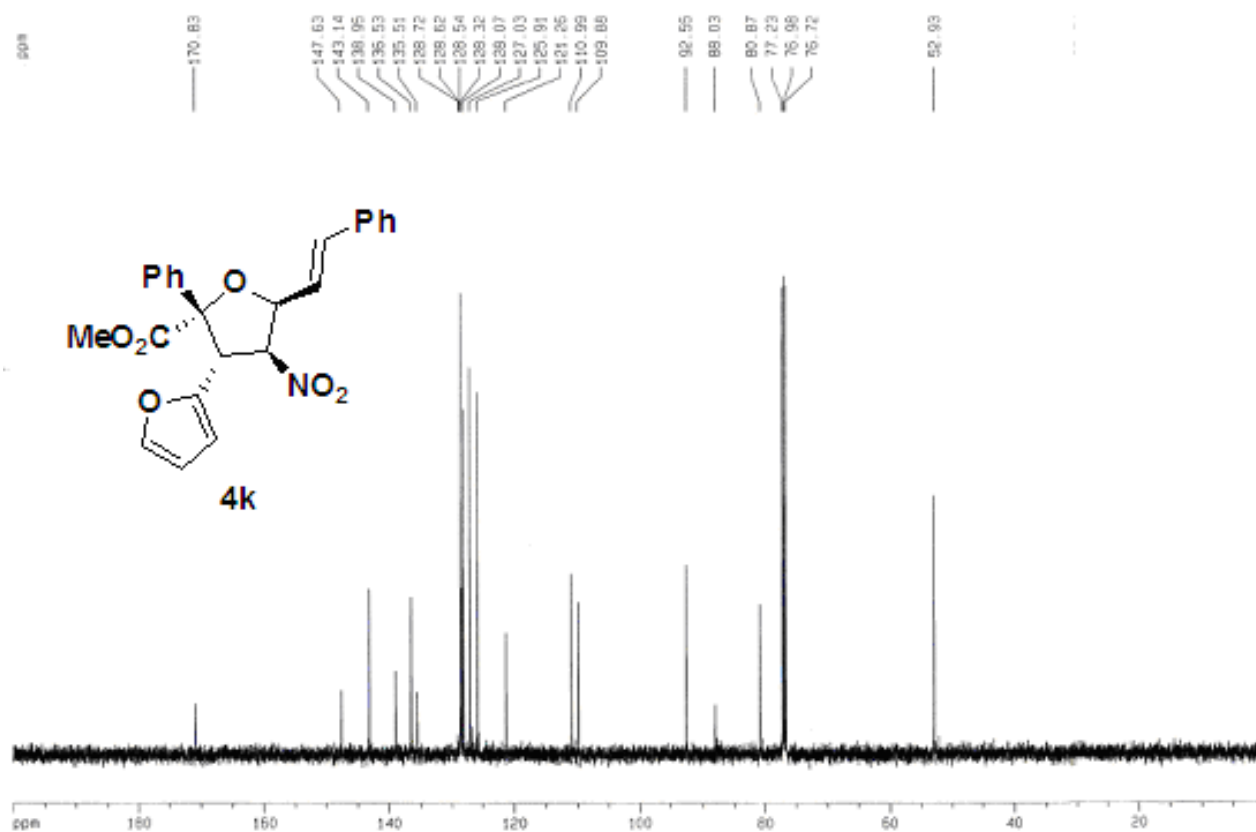

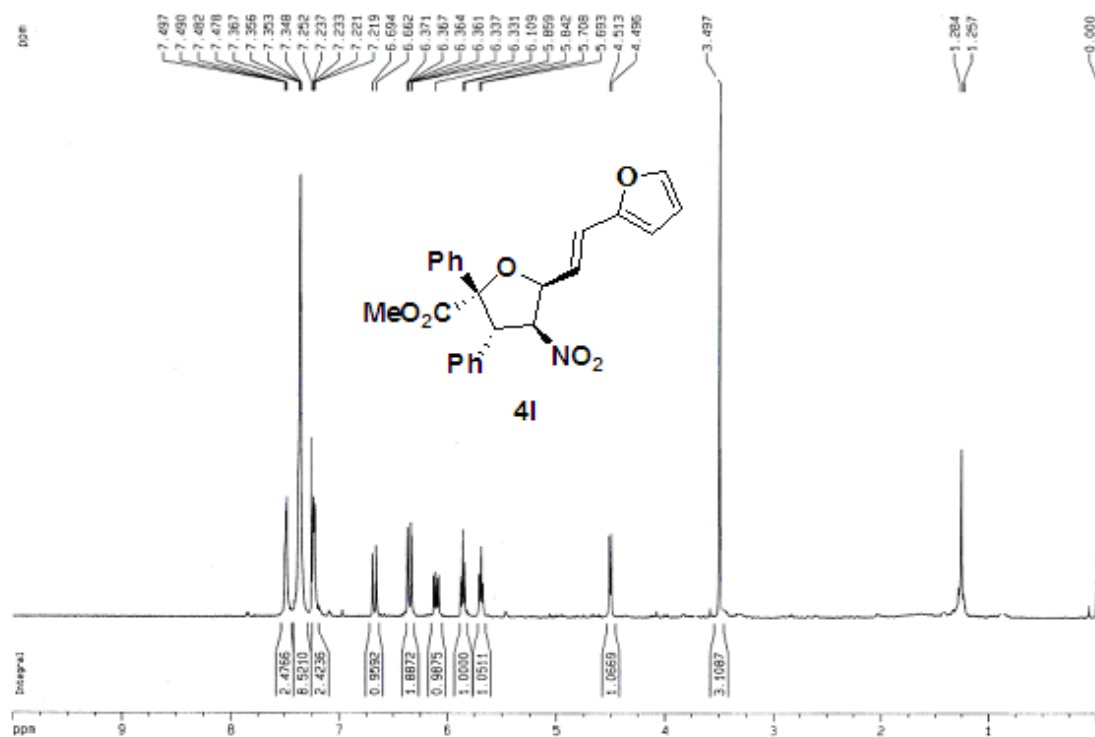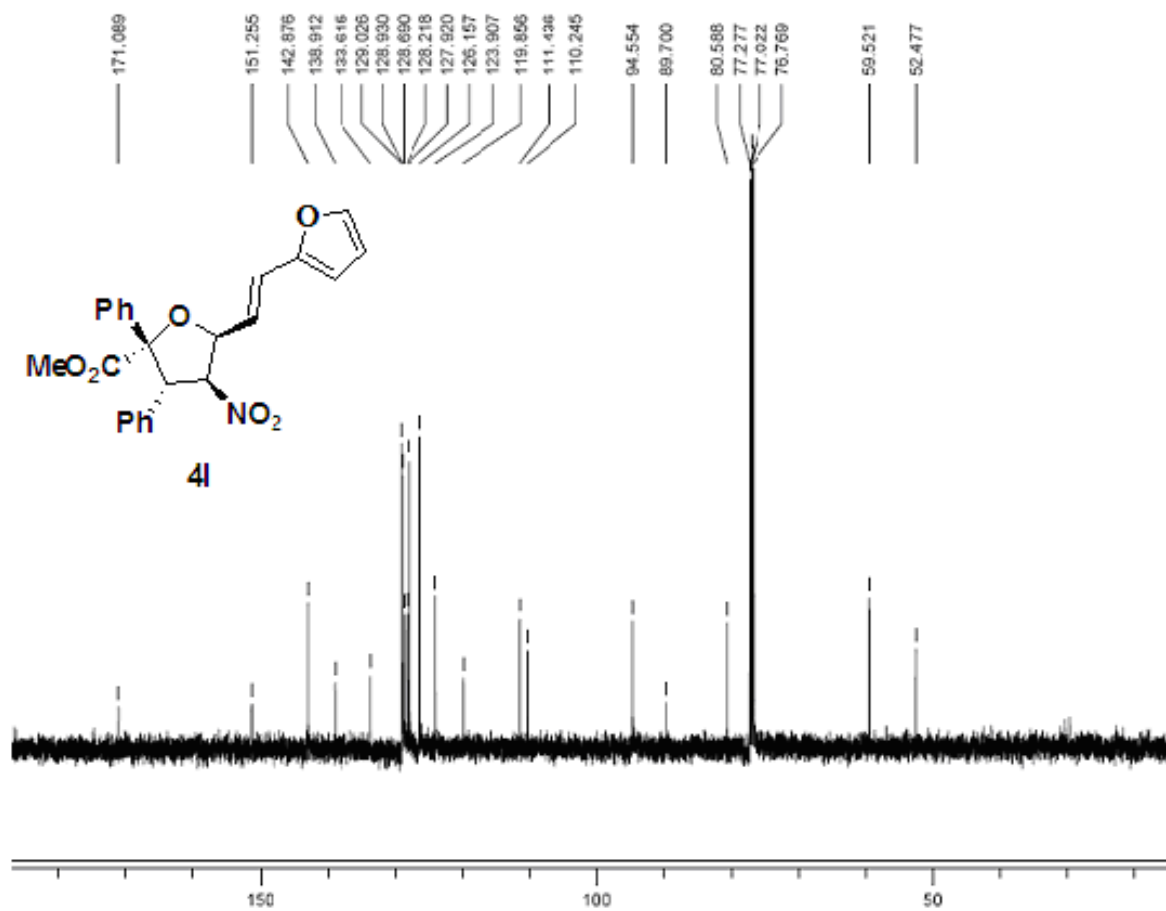

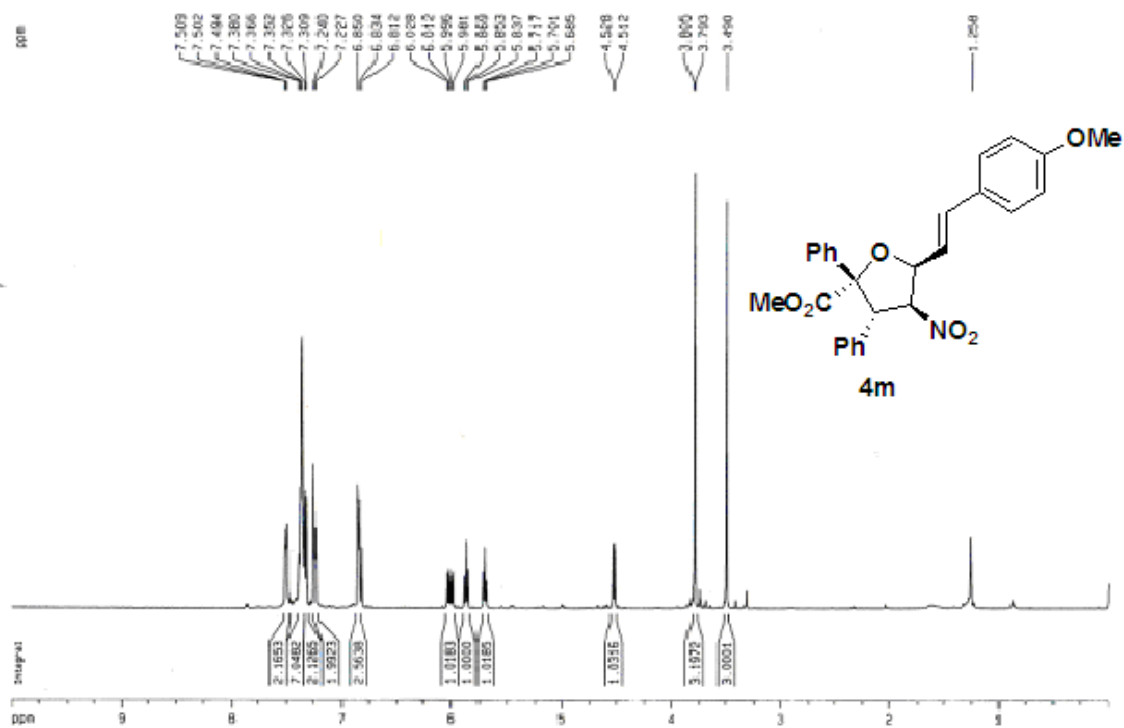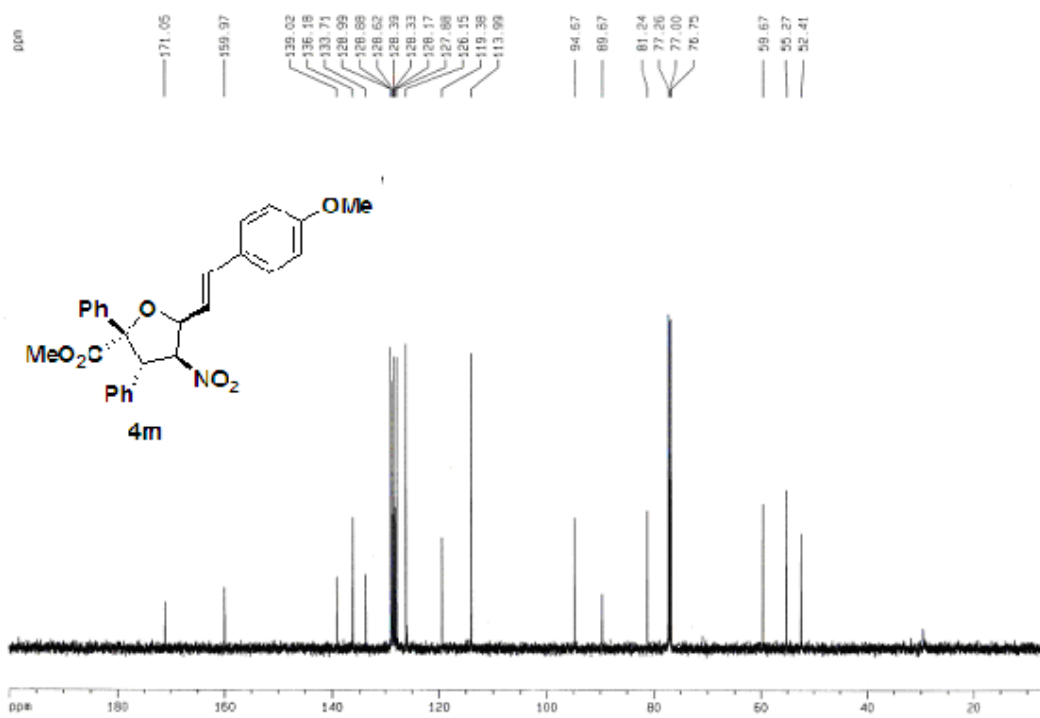









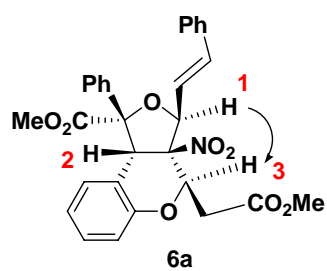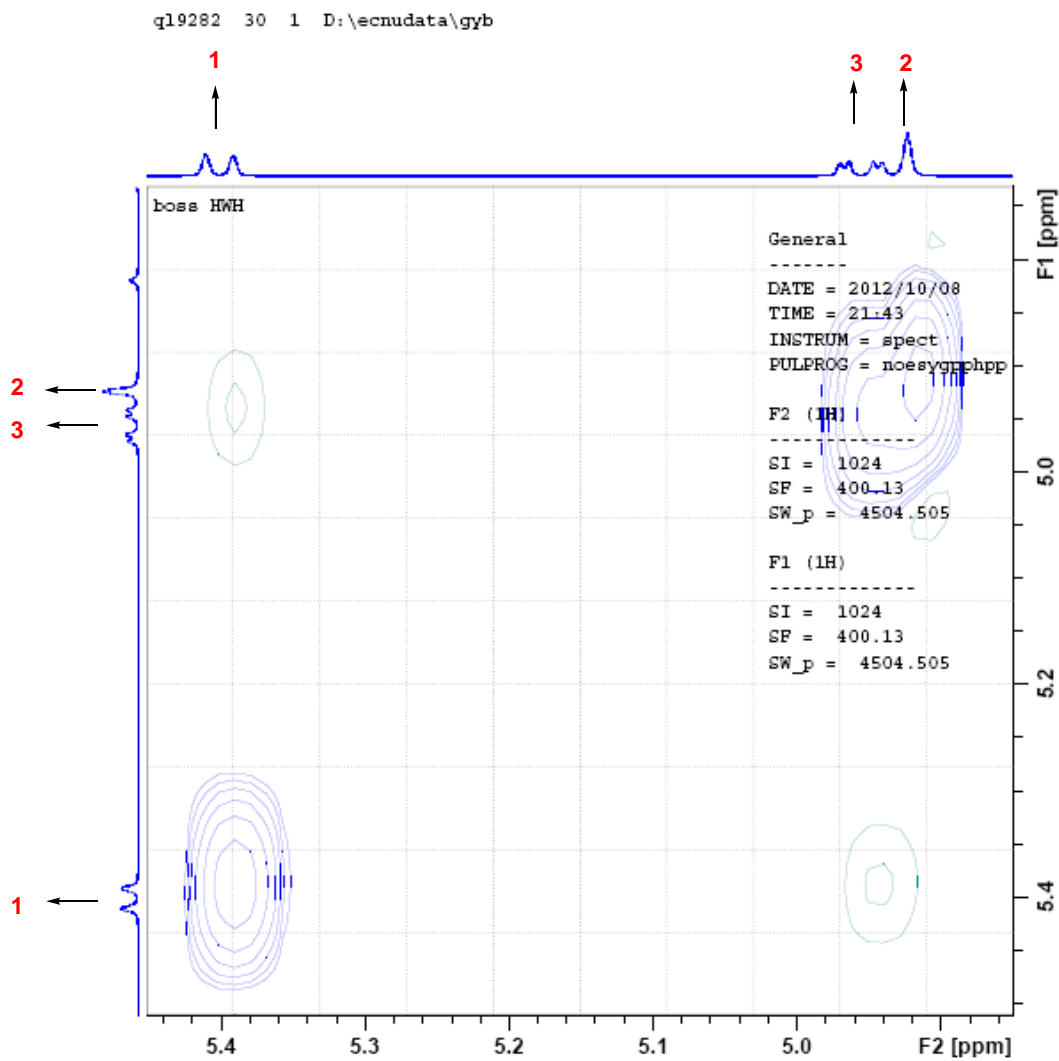

#### 4. $^1\text{H}$ NMR NOESY spectrum of **4h** Minor Diastereomer

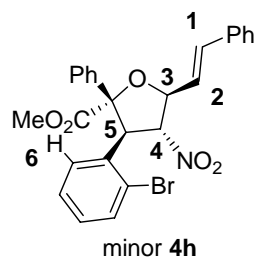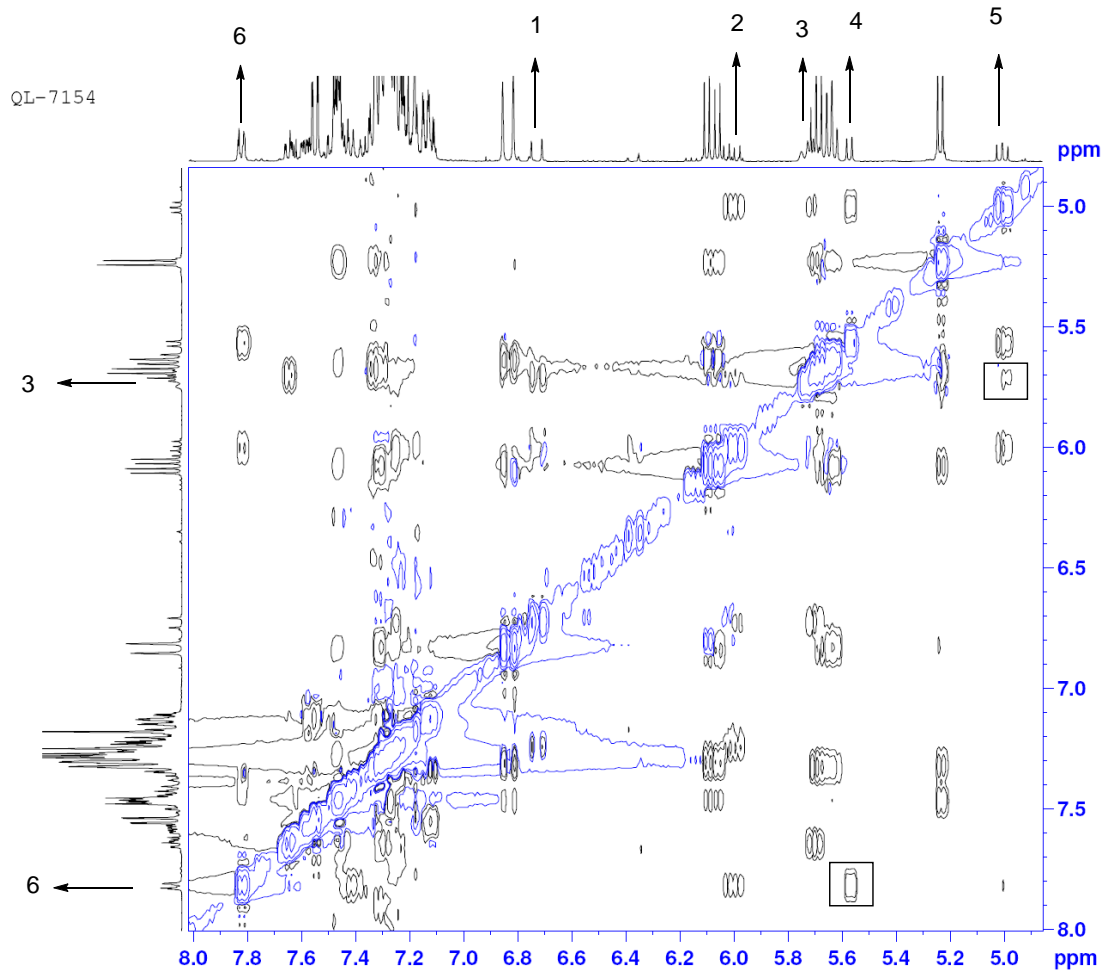

Supplement: c3ra44123g.pdf [file c3ra44123g.pdf]
